# Supplementary material for: Recent tectonism on Mercury revealed by a global population of small grabens
Source: Research Square preprint supplement (doi:10.21203/rs.3.rs-2378725/v1), 2023-01-05
Supplement: Supplementary file 1 [file 6aa58f52c42b2583ff2d550e.xlsx]

## Sheet: Shadow Measurements
Quadrangle	Structure Name	Name	Can shadow measurements be made?	Graben designation	Measurement #	Graben FixedID	Frame ID	Solar Azimuth (Ground)	Solar Azimith (Opposite)	Centre Incidence Angle	Centre Incidence Angle (Radians)	Centre Emission Angle	Centre Emission Angle (Radians)	Centre Phase Angle	Shadow length measurement (metres)	Depth of graben (+)	Depth of graben (-)	Average Depth	Rate of infilling (fastest rate 5+3)	Rate of infilling (slowest rate 5-3)	Rate of infilling (fastest rate 16)	Rate of infilling (slowest rate 4)
H01	Guest Dorsum	A	Y	1	1	682	EN1052963743M	233.855	53.8551	79.1243	1.38098	25.3463	0.442377	104.47	53.4807	9.41809		26.9662	337.077	1348.31	168.539	674.154
					2		EN1052963743M	233.855	53.8551	79.1243	1.38098	25.3463	0.442377	104.47	118.853	20.9303		26.9662	337.077	1348.31	168.539	674.154
					3		EN1052963743M	233.855	53.8551	79.1243	1.38098	25.3463	0.442377	104.47	126.976	22.3609		26.9662	337.077	1348.31	168.539	674.154
					4		EN1052963743M	233.855	53.8551	79.1243	1.38098	25.3463	0.442377	104.47	211.345	37.2184		26.9662	337.077	1348.31	168.539	674.154
					5		EN1052963743M	233.855	53.8551	79.1243	1.38098	25.3463	0.442377	104.47	190.736	33.589		26.9662	337.077	1348.31	168.539	674.154
					6		EN1052963743M	233.855	53.8551	79.1243	1.38098	25.3463	0.442377	104.47	217.376	38.2804		26.9662	337.077	1348.31	168.539	674.154
				2	1	683	EN1052963743M	233.855	53.8551	79.1243	1.38098	25.3463	0.442377	104.47	41.7685	7.35553		7.40345	92.5432	370.173	46.2716	185.086
					2		EN1052963743M	233.855	53.8551	79.1243	1.38098	25.3463	0.442377	104.47	38.1875	6.72492		7.40345	92.5432	370.173	46.2716	185.086
					3		EN1052963743M	233.855	53.8551	79.1243	1.38098	25.3463	0.442377	104.47	42.3865	7.46437		7.40345	92.5432	370.173	46.2716	185.086
					4		EN1052963743M	233.855	53.8551	79.1243	1.38098	25.3463	0.442377	104.47	45.8198	8.06899		7.40345	92.5432	370.173	46.2716	185.086
			N	3		684
	Unnamed	B	N	1		626
	Unnamed	C	N	1		694
H02	Unnamed	A	N	1		17
			Y	2	1	28	EN1015222514M	284.138	104.138	81.357	1.41995	40.5879	0.708392	121.944	42.5853	5.72725		5.67909	70.9887	283.955	35.4943	141.977
					2		EN1015222514M	284.138	104.138	81.357	1.41995	40.5879	0.708392	121.944	41.8691	5.63094		5.67909	70.9887	283.955	35.4943	141.977
				3	1	27	EN1015222514M	284.138	104.138	81.357	1.41995	40.5879	0.708392	121.944	56.2532	7.56544		8.88785	111.098	444.393	55.5491	222.196
					2		EN1015222514M	284.138	104.138	81.357	1.41995	40.5879	0.708392	121.944	75.919	10.2103		8.88785	111.098	444.393	55.5491	222.196
H03	Schiaparelli Dorsum	A	N	1		56
	Vejas Rupes	B	Y	1	1	60	EN0212502528M	99.8455	279.845	76.5767	1.33652	3.83757	0.0669783	72.7518	116.921		28.3588	25.693	321.162	1284.65	160.581	642.325
					2		EN0212502528M	99.8455	279.845	76.5767	1.33652	3.83757	0.0669783	72.7518	94.9396		23.0272	25.693	321.162	1284.65	160.581	642.325
	Unnamed	C	N	1		69
				2		70
H04	Yelcho Rupes	A	Y	1	1	119	EN1015541044M	264.057	84.0571	76.4329	1.33401	18.5449	0.323669	57.9411	76.0943		19.9804	22.151	276.887	1107.55	138.444	553.774
					2		EN1015541044M	264.057	84.0571	76.4329	1.33401	18.5449	0.323669	57.9411	109.139		28.6572	22.151	276.887	1107.55	138.444	553.774
					3		EN1015541044M	264.057	84.0571	76.4329	1.33401	18.5449	0.323669	57.9411	67.8483		17.8152	22.151	276.887	1107.55	138.444	553.774
				2	1	105	EN1015541044M	264.057	84.0571	76.4329	1.33401	18.5449	0.323669	57.9411	81.9746		21.5244	21.7842	272.302	1089.21	136.151	544.604
					2		EN1015541044M	264.057	84.0571	76.4329	1.33401	18.5449	0.323669	57.9411	83.9528		22.0439	21.7842	272.302	1089.21	136.151	544.604
				3	1	106	EN1015541044M	264.057	84.0571	76.4329	1.33401	18.5449	0.323669	57.9411	101.514		26.6551	23.2368	290.46	1161.84	145.23	580.92
					2		EN1015541044M	264.057	84.0571	76.4329	1.33401	18.5449	0.323669	57.9411	112.404		29.5145	23.2368	290.46	1161.84	145.23	580.92
					3		EN1015541044M	264.057	84.0571	76.4329	1.33401	18.5449	0.323669	57.9411	69.1182		18.1487	23.2368	290.46	1161.84	145.23	580.92
					4		EN1015541044M	264.057	84.0571	76.4329	1.33401	18.5449	0.323669	57.9411	70.9473		18.629	23.2368	290.46	1161.84	145.23	580.92
				4	1	104	EN1015541044M	264.057	84.0571	76.4329	1.33401	18.5449	0.323669	57.9411	63.1554		16.583	22.4514	280.643	1122.57	140.321	561.285
					2		EN1015541044M	264.057	84.0571	76.4329	1.33401	18.5449	0.323669	57.9411	93.1063		24.4474	22.4514	280.643	1122.57	140.321	561.285
					3		EN1015541044M	264.057	84.0571	76.4329	1.33401	18.5449	0.323669	57.9411	100.253		26.3239	22.4514	280.643	1122.57	140.321	561.285
				5	1	118	EN1015541044M	264.057	84.0571	76.4329	1.33401	18.5449	0.323669	57.9411	76.6656		20.1304	18.7079	233.849	935.397	116.925	467.699
					2		EN1015541044M	264.057	84.0571	76.4329	1.33401	18.5449	0.323669	57.9411	65.8305		17.2854	18.7079	233.849	935.397	116.925	467.699
			N	6		117
				7		116
	Unnamed	B	N	1		120
			N	2		121
	Endurance Rupes	C	Y	1	1	98	EN1015339401M	263.417	83.4173	74.3099	1.29695	2.7914	0.0487192	77.0881	106.559		30.3483	35.1633	439.541	1758.16	219.771	879.082
					2		EN1015339401M	263.417	83.4173	74.3099	1.29695	2.7914	0.0487192	77.0881	103.048		29.3482	35.1633	439.541	1758.16	219.771	879.082
					3		EN1015339401M	263.417	83.4173	74.3099	1.29695	2.7914	0.0487192	77.0881	139.965		39.8623	35.1633	439.541	1758.16	219.771	879.082
					4		EN1015339401M	263.417	83.4173	74.3099	1.29695	2.7914	0.0487192	77.0881	144.291		41.0943	35.1633	439.541	1758.16	219.771	879.082
				2	1	99	EN1015339401M	263.417	83.4173	74.3099	1.29695	2.7914	0.0487192	77.0881	124.591		35.4836	41.9677	524.596	2098.38	262.298	1049.19
					2		EN1015339401M	263.417	83.4173	74.3099	1.29695	2.7914	0.0487192	77.0881	171.55		48.8577	41.9677	524.596	2098.38	262.298	1049.19
					3		EN1015339401M	263.417	83.4173	74.3099	1.29695	2.7914	0.0487192	77.0881	149.733		42.6443	41.9677	524.596	2098.38	262.298	1049.19
					4		EN1015339401M	263.417	83.4173	74.3099	1.29695	2.7914	0.0487192	77.0881	156.036		44.4393	41.9677	524.596	2098.38	262.298	1049.19
					5		EN1015339401M	263.417	83.4173	74.3099	1.29695	2.7914	0.0487192	77.0881	134.879		38.4136	41.9677	524.596	2098.38	262.298	1049.19
			N	3		101
				4		102
	Unnamed	D	N	1		138
	Xue Long Rupes	E	N	1		148
H06	Aegeao	A	Y	1	1	213	EN1015451229M	87.778	267.778	79.3867	1.38556	50.5489	0.882244	129.935	272.857	41.6462		33.6179	420.224	1680.9	210.112	840.448
					2		EN1015451229M	87.778	267.778	79.3867	1.38556	50.5489	0.882244	129.935	209.321	31.9486		33.6179	420.224	1680.9	210.112	840.448
					3		EN1015451229M	87.778	267.778	79.3867	1.38556	50.5489	0.882244	129.935	178.596	27.259		33.6179	420.224	1680.9	210.112	840.448
	Darshak Rupes	B	N	1		183
			Y	2	1	182	EN0243798227M	273.847	93.8465	78.1843	1.36457	10.0984	0.17625	68.0904	161.129		35.0123	42.9718	537.148	2148.59	268.574	1074.3
					2		EN0243798227M	273.847	93.8465	78.1843	1.36457	10.0984	0.17625	68.0904	234.39		50.9314	42.9718	537.148	2148.59	268.574	1074.3
H08	Selen Rupes	A	N	1		318
				2		317
	Alvin Rupes	B	N	1		262
				2		263
			Y	3	1	233	EN1015167012M	267.965	87.9653	75.6439	1.32024	12.6154	0.220181	88.2594	118.694	28.7325		29.1973	364.966	1459.87	182.483	729.933
					2		EN1015167012M	267.965	87.9653	75.6439	1.32024	12.6154	0.220181	88.2594	152.155	36.8325		29.1973	364.966	1459.87	182.483	729.933
					3		EN1015167012M	267.965	87.9653	75.6439	1.32024	12.6154	0.220181	88.2594	90.9926	22.0268		29.1973	364.966	1459.87	182.483	729.933
				4	1	231	EN1015167012M	267.965	87.9653	75.6439	1.32024	12.6154	0.220181	88.2594	116.033	28.0884		30.4927	381.159	1524.64	190.58	762.319
					2		EN1015167012M	267.965	87.9653	75.6439	1.32024	12.6154	0.220181	88.2594	131.907	31.931		30.4927	381.159	1524.64	190.58	762.319
					3		EN1015167012M	267.965	87.9653	75.6439	1.32024	12.6154	0.220181	88.2594	121.153	29.3279		30.4927	381.159	1524.64	190.58	762.319
					4		EN1015167012M	267.965	87.9653	75.6439	1.32024	12.6154	0.220181	88.2594	133.352	32.281		30.4927	381.159	1524.64	190.58	762.319
					5		EN1015167012M	267.965	87.9653	75.6439	1.32024	12.6154	0.220181	88.2594	132.377	32.045		30.4927	381.159	1524.64	190.58	762.319
					6		EN1015167012M	267.965	87.9653	75.6439	1.32024	12.6154	0.220181	88.2594	120.969	29.2832		30.4927	381.159	1524.64	190.58	762.319
				5	1	709	EN1015167012M	267.965	87.9653	75.6439	1.32024	12.6154	0.220181	88.2594	67.1839	16.2634		18.6557	233.197	932.787	116.598	466.394
					2		EN1015167012M	267.965	87.9653	75.6439	1.32024	12.6154	0.220181	88.2594	86.9495	21.0481		18.6557	233.197	932.787	116.598	466.394
				6	1	232	EN1015167012M	267.965	87.9653	75.6439	1.32024	12.6154	0.220181	88.2594	300.113	72.6492		43.053	538.162	2152.65	269.081	1076.32
					2		EN1015167012M	267.965	87.9653	75.6439	1.32024	12.6154	0.220181	88.2594	219.617	53.1634		43.053	538.162	2152.65	269.081	1076.32
					3		EN1015167012M	267.965	87.9653	75.6439	1.32024	12.6154	0.220181	88.2594	121.057	29.3047		43.053	538.162	2152.65	269.081	1076.32
					4		EN1015167012M	267.965	87.9653	75.6439	1.32024	12.6154	0.220181	88.2594	191.181	46.2796		43.053	538.162	2152.65	269.081	1076.32
					5		EN1015167012M	267.965	87.9653	75.6439	1.32024	12.6154	0.220181	88.2594	155.788	37.7121		43.053	538.162	2152.65	269.081	1076.32
					6		EN1015167012M	267.965	87.9653	75.6439	1.32024	12.6154	0.220181	88.2594	171.742	41.574		43.053	538.162	2152.65	269.081	1076.32
					7		EN1015167012M	267.965	87.9653	75.6439	1.32024	12.6154	0.220181	88.2594	129.314	31.3035		43.053	538.162	2152.65	269.081	1076.32
					8		EN1015167012M	267.965	87.9653	75.6439	1.32024	12.6154	0.220181	88.2594	133.998	32.4374		43.053	538.162	2152.65	269.081	1076.32
				7	1	706	EN1015167012M	267.965	87.9653	75.6439	1.32024	12.6154	0.220181	88.2594	88.8526	21.5088		19.8801	248.502	994.007	124.251	497.003
					2		EN1015167012M	267.965	87.9653	75.6439	1.32024	12.6154	0.220181	88.2594	83.5903	20.2349		19.8801	248.502	994.007	124.251	497.003
					3		EN1015167012M	267.965	87.9653	75.6439	1.32024	12.6154	0.220181	88.2594	73.9309	17.8967		19.8801	248.502	994.007	124.251	497.003
				8	1	707	EN1015167012M	267.965	87.9653	75.6439	1.32024	12.6154	0.220181	88.2594	112.721	27.2866		26.6266	332.832	1331.33	166.416	665.664
					2		EN1015167012M	267.965	87.9653	75.6439	1.32024	12.6154	0.220181	88.2594	91.8506	22.2345		26.6266	332.832	1331.33	166.416	665.664
					3		EN1015167012M	267.965	87.9653	75.6439	1.32024	12.6154	0.220181	88.2594	125.411	30.3586		26.6266	332.832	1331.33	166.416	665.664
				9	1	235	EN1015167012M	267.965	87.9653	75.6439	1.32024	12.6154	0.220181	88.2594	103.202	24.9825		21.0226	262.783	1051.13	131.392	525.566
					2		EN1015167012M	267.965	87.9653	75.6439	1.32024	12.6154	0.220181	88.2594	84.3812	20.4264		21.0226	262.783	1051.13	131.392	525.566
					3		EN1015167012M	267.965	87.9653	75.6439	1.32024	12.6154	0.220181	88.2594	88.2972	21.3744		21.0226	262.783	1051.13	131.392	525.566
					4		EN1015167012M	267.965	87.9653	75.6439	1.32024	12.6154	0.220181	88.2594	71.4964	17.3073		21.0226	262.783	1051.13	131.392	525.566
				10	1	236	EN1015167012M	267.965	87.9653	75.6439	1.32024	12.6154	0.220181	88.2594	77.1275	18.6705		40.7938	509.922	2039.69	254.961	1019.84
					2		EN1015167012M	267.965	87.9653	75.6439	1.32024	12.6154	0.220181	88.2594	93.2085	22.5633		40.7938	509.922	2039.69	254.961	1019.84
					3		EN1015167012M	267.965	87.9653	75.6439	1.32024	12.6154	0.220181	88.2594	134.083	32.4579		40.7938	509.922	2039.69	254.961	1019.84
					4		EN1015167012M	267.965	87.9653	75.6439	1.32024	12.6154	0.220181	88.2594	188.567	45.6469		40.7938	509.922	2039.69	254.961	1019.84
					5		EN1015167012M	267.965	87.9653	75.6439	1.32024	12.6154	0.220181	88.2594	294.46	71.2808		40.7938	509.922	2039.69	254.961	1019.84
					6		EN1015167012M	267.965	87.9653	75.6439	1.32024	12.6154	0.220181	88.2594	223.666	54.1434		40.7938	509.922	2039.69	254.961	1019.84
				11	1	234	EN1015167012M	267.965	87.9653	75.6439	1.32024	12.6154	0.220181	88.2594	145.6	35.2458		44.3553	554.441	2217.77	277.221	1108.88
					2		EN1015167012M	267.965	87.9653	75.6439	1.32024	12.6154	0.220181	88.2594	173.657	42.0377		44.3553	554.441	2217.77	277.221	1108.88
					3		EN1015167012M	267.965	87.9653	75.6439	1.32024	12.6154	0.220181	88.2594	211.444	51.1849		44.3553	554.441	2217.77	277.221	1108.88
					4		EN1015167012M	267.965	87.9653	75.6439	1.32024	12.6154	0.220181	88.2594	224.845	54.4288		44.3553	554.441	2217.77	277.221	1108.88
					5		EN1015167012M	267.965	87.9653	75.6439	1.32024	12.6154	0.220181	88.2594	206.6	50.0122		44.3553	554.441	2217.77	277.221	1108.88
					6		EN1015167012M	267.965	87.9653	75.6439	1.32024	12.6154	0.220181	88.2594	137.241	33.2224		44.3553	554.441	2217.77	277.221	1108.88
				12	1	295	EN1015167012M	267.965	87.9653	75.6439	1.32024	12.6154	0.220181	88.2594	124.981	30.2545		38.4639	480.799	1923.19	240.399	961.597
					2		EN1015167012M	267.965	87.9653	75.6439	1.32024	12.6154	0.220181	88.2594	171.646	41.5509		38.4639	480.799	1923.19	240.399	961.597
					3		EN1015167012M	267.965	87.9653	75.6439	1.32024	12.6154	0.220181	88.2594	180.054	43.5862		38.4639	480.799	1923.19	240.399	961.597
			N	13		708
			Y	14	1	273	EN0250940922M	267.666	87.6662	76.647	1.33774	20.3093	0.354465	96.9546	81.9269	17.8764		33.8911	423.639	1694.56	211.819	847.278
					2		EN0250940922M	267.666	87.6662	76.647	1.33774	20.3093	0.354465	96.9546	84.7361	18.4893		33.8911	423.639	1694.56	211.819	847.278
					3		EN0250940922M	267.666	87.6662	76.647	1.33774	20.3093	0.354465	96.9546	148.147	32.3255		33.8911	423.639	1694.56	211.819	847.278
					4		EN0250940922M	267.666	87.6662	76.647	1.33774	20.3093	0.354465	96.9546	72.2392	15.7625		33.8911	423.639	1694.56	211.819	847.278
					5		EN0250940922M	267.666	87.6662	76.647	1.33774	20.3093	0.354465	96.9546	172.515	37.6427		33.8911	423.639	1694.56	211.819	847.278
					6		EN0250940922M	267.666	87.6662	76.647	1.33774	20.3093	0.354465	96.9546	286.629	62.5423		33.8911	423.639	1694.56	211.819	847.278
					7		EN0250940922M	267.666	87.6662	76.647	1.33774	20.3093	0.354465	96.9546	226.723	49.4708		33.8911	423.639	1694.56	211.819	847.278
					8		EN0250940922M	267.666	87.6662	76.647	1.33774	20.3093	0.354465	96.9546	202.289	44.1393		33.8911	423.639	1694.56	211.819	847.278
					9		EN0250940922M	267.666	87.6662	76.647	1.33774	20.3093	0.354465	96.9546	179.063	39.0715		33.8911	423.639	1694.56	211.819	847.278
					10		EN0250940922M	267.666	87.6662	76.647	1.33774	20.3093	0.354465	96.9546	98.9507	21.5909		33.8911	423.639	1694.56	211.819	847.278
	Schiaparelli Dorsum	C	N	1	1	221	EN0227726196M	95.1175	275.117	76.5824	1.33661	10.2907	0.179607	78.0609	111.868
					2		EN0227726196M	95.1175	275.117	76.5824	1.33661	10.2907	0.179607	78.0609	169.997
					3		EN0227726196M	95.1175	275.117	76.5824	1.33661	10.2907	0.179607	78.0609	166.753
					4		EN0227726196M	95.1175	275.117	76.5824	1.33661	10.2907	0.179607	78.0609	176.27
				2	1	225	EN0227726196M	95.1175	275.117	76.5824	1.33661	10.2907	0.179607	78.0609	214.308
					2		EN0227726196M	95.1175	275.117	76.5824	1.33661	10.2907	0.179607	78.0609	219.945
					3		EN0227726196M	95.1175	275.117	76.5824	1.33661	10.2907	0.179607	78.0609	209.772
			N	3		223
			N	4		224
	Pisces Rupes	D	Y	1	1	246	EN0258282872M	90.6671	270.667	82.0891	1.43272	10.236	0.178651	92.3201	187.927	25.4744		30.4695	380.869	1523.47	190.434	761.737
					2		EN0258282872M	90.6671	270.667	82.0891	1.43272	10.236	0.178651	92.3201	274.097	37.1551		30.4695	380.869	1523.47	190.434	761.737
					3		EN0258282872M	90.6671	270.667	82.0891	1.43272	10.236	0.178651	92.3201	231.722	31.411		30.4695	380.869	1523.47	190.434	761.737
					4		EN0258282872M	90.6671	270.667	82.0891	1.43272	10.236	0.178651	92.3201	258.102	34.9869		30.4695	380.869	1523.47	190.434	761.737
					5		EN0258282872M	90.6671	270.667	82.0891	1.43272	10.236	0.178651	92.3201	172.035	23.3202		30.4695	380.869	1523.47	190.434	761.737
	Akademik Rupes	E	Y	1	1	249	EN0242754192M	88.5932	268.593	78.9682	1.37826	4.19289	0.0731798	74.7939	353.959		70.0071	63.1682	789.603	3158.41	394.801	1579.21
					2		EN0242754192M	88.5932	268.593	78.9682	1.37826	4.19289	0.0731798	74.7939	352.598		69.738	63.1682	789.603	3158.41	394.801	1579.21
					3		EN0242754192M	88.5932	268.593	78.9682	1.37826	4.19289	0.0731798	74.7939	251.586		49.7596	63.1682	789.603	3158.41	394.801	1579.21
	Protea Rupes	F	Y	1	1	261	EN0250768612M	271.987	91.9874	74.2987	1.29676	35.6163	0.621623	109.914	519.264	121.503		124.8	1560	6239.99	779.999	3120
					2		EN0250768612M	271.987	91.9874	74.2987	1.29676	35.6163	0.621623	109.914	547.444	128.097		124.8	1560	6239.99	779.999	3120
				2	1	258	EN0250768612M	271.987	91.9874	74.2987	1.29676	35.6163	0.621623	109.914	233.747	54.6945		56.4798	705.998	2823.99	352.999	1412
					2		EN0250768612M	271.987	91.9874	74.2987	1.29676	35.6163	0.621623	109.914	249.006	58.2651		56.4798	705.998	2823.99	352.999	1412
				3	1	260	EN0250768612M	271.987	91.9874	74.2987	1.29676	35.6163	0.621623	109.914	222.425	52.0453		53.4548	668.185	2672.74	334.092	1336.37
					2		EN0250768612M	271.987	91.9874	74.2987	1.29676	35.6163	0.621623	109.914	234.472	54.8643		53.4548	668.185	2672.74	334.092	1336.37
				4	1	259	EN0250768612M	271.987	91.9874	74.2987	1.29676	35.6163	0.621623	109.914	188.036	43.9988		77.7583	971.979	3887.91	485.989	1943.96
					2		EN0250768612M	271.987	91.9874	74.2987	1.29676	35.6163	0.621623	109.914	317.958	74.3993		77.7583	971.979	3887.91	485.989	1943.96
					3		EN0250768612M	271.987	91.9874	74.2987	1.29676	35.6163	0.621623	109.914	318.915	74.623		77.7583	971.979	3887.91	485.989	1943.96
					4		EN0250768612M	271.987	91.9874	74.2987	1.29676	35.6163	0.621623	109.914	447.778	104.776		77.7583	971.979	3887.91	485.989	1943.96
					5		EN0250768612M	271.987	91.9874	74.2987	1.29676	35.6163	0.621623	109.914	477.471	111.724		77.7583	971.979	3887.91	485.989	1943.96
					6		EN0250768612M	271.987	91.9874	74.2987	1.29676	35.6163	0.621623	109.914	243.724	57.0291		77.7583	971.979	3887.91	485.989	1943.96
	Lance Rupes	G	Y	1	1	275	EN1014792988M	270.345	90.3445	81.66	1.42524	24.2201	0.42272	105.878	800.797	110.132		108.609	1357.61	5430.45	678.807	2715.23
					2		EN1014792988M	270.345	90.3445	81.66	1.42524	24.2201	0.42272	105.878	778.646	107.086		108.609	1357.61	5430.45	678.807	2715.23
				2	1	279	EN1014792988M	270.345	90.3445	81.66	1.42524	24.2201	0.42272	105.878	317.724	43.6961		34.8207	435.258	1741.03	217.629	870.517
					2		EN1014792988M	270.345	90.3445	81.66	1.42524	24.2201	0.42272	105.878	188.654	25.9452		34.8207	435.258	1741.03	217.629	870.517
				3	1	276	EN1014792988M	270.345	90.3445	81.66	1.42524	24.2201	0.42272	105.878	309.536	42.57		34.2208	427.76	1711.04	213.88	855.52
					2		EN1014792988M	270.345	90.3445	81.66	1.42524	24.2201	0.42272	105.878	188.119	25.8716		34.2208	427.76	1711.04	213.88	855.52
				4	1	277	EN1014792988M	270.345	90.3445	81.66	1.42524	24.2201	0.42272	105.878	341.858	47.0152		45.1759	564.699	2258.8	282.349	1129.4
					2		EN1014792988M	270.345	90.3445	81.66	1.42524	24.2201	0.42272	105.878	315.111	43.3366		45.1759	564.699	2258.8	282.349	1129.4
				5	1	710	EN1014792988M	270.345	90.3445	81.66	1.42524	24.2201	0.42272	105.878	358.222	49.2657		46.7114	583.893	2335.57	291.946	1167.79
					2		EN1014792988M	270.345	90.3445	81.66	1.42524	24.2201	0.42272	105.878	321.077	44.1572		46.7114	583.893	2335.57	291.946	1167.79
				6	1	278	EN1014792988M	270.345	90.3445	81.66	1.42524	24.2201	0.42272	105.878	216.792	29.815		32.9976	412.47	1649.88	206.235	824.941
					2		EN1014792988M	270.345	90.3445	81.66	1.42524	24.2201	0.42272	105.878	263.075	36.1803		32.9976	412.47	1649.88	206.235	824.941
	Unnamed	H	N	1		288
	Tangaroa Rupes	I	Y	1	1	289	EN1014446861M	269.736	89.7357	82.2063	1.43477	47.1023	0.822091	126.13	121.704	14.519		13.295	166.188	664.75	83.0938	332.375
					2		EN1014446861M	269.736	89.7357	82.2063	1.43477	47.1023	0.822091	126.13	102.762	12.2593		13.295	166.188	664.75	83.0938	332.375
					3		EN1014446861M	269.736	89.7357	82.2063	1.43477	47.1023	0.822091	126.13	76.5173	9.12833		13.295	166.188	664.75	83.0938	332.375
					4		EN1014446861M	269.736	89.7357	82.2063	1.43477	47.1023	0.822091	126.13	99.1706	11.8308		13.295	166.188	664.75	83.0938	332.375
					5		EN1014446861M	269.736	89.7357	82.2063	1.43477	47.1023	0.822091	126.13	157.066	18.7376		13.295	166.188	664.75	83.0938	332.375
			Y	2	1	290	EN1014446861M	269.736	89.7357	82.2063	1.43477	47.1023	0.822091	126.13	162.79	19.4205		19.4205	242.756	971.025	121.378	485.513
	Unnamed	J	N	1		292
				2		291
				3		293
	Hesperides Rupes	K	Y	1	1	309	EN1014677849M	270.492	90.4916	83.0232	1.44903	28.1778	0.491796	111.199	118.844	13.6486		12.1528	151.91	607.638	75.9548	303.819
					2		EN1014677849M	270.492	90.4916	83.0232	1.44903	28.1778	0.491796	111.199	109.19	12.5398		12.1528	151.91	607.638	75.9548	303.819
					3		EN1014677849M	270.492	90.4916	83.0232	1.44903	28.1778	0.491796	111.199	99.2725	11.4009		12.1528	151.91	607.638	75.9548	303.819
					4		EN1014677849M	270.492	90.4916	83.0232	1.44903	28.1778	0.491796	111.199	95.9719	11.0218		12.1528	151.91	607.638	75.9548	303.819
			Y	2	1	310	EN1014677849M	270.492	90.4916	83.0232	1.44903	28.1778	0.491796	111.199	155.297	17.835		16.9154	211.443	845.771	105.721	422.885
					2		EN1014677849M	270.492	90.4916	83.0232	1.44903	28.1778	0.491796	111.199	123.42	14.1741		16.9154	211.443	845.771	105.721	422.885
					3		EN1014677849M	270.492	90.4916	83.0232	1.44903	28.1778	0.491796	111.199	163.153	18.7371		16.9154	211.443	845.771	105.721	422.885
	Unnamed	L	Y	1	1	287	EN1052817095M	90.1554	270.155	81.432	1.42126	34.2834	0.598358	115.714	566.444	77.3937		39.6487	495.609	1982.44	247.805	991.218
					2		EN1052817095M	90.1554	270.155	81.432	1.42126	34.2834	0.598358	115.714	362.013	49.4622		39.6487	495.609	1982.44	247.805	991.218
					3		EN1052817095M	90.1554	270.155	81.432	1.42126	34.2834	0.598358	115.714	420.655	57.4744		39.6487	495.609	1982.44	247.805	991.218
					4		EN1052817095M	90.1554	270.155	81.432	1.42126	34.2834	0.598358	115.714	212.464	29.0292		39.6487	495.609	1982.44	247.805	991.218
					5		EN1052817095M	90.1554	270.155	81.432	1.42126	34.2834	0.598358	115.714	235.529	32.1805		39.6487	495.609	1982.44	247.805	991.218
					6		EN1052817095M	90.1554	270.155	81.432	1.42126	34.2834	0.598358	115.714	194.856	26.6233		39.6487	495.609	1982.44	247.805	991.218
					7		EN1052817095M	90.1554	270.155	81.432	1.42126	34.2834	0.598358	115.714	150.804	20.6045		39.6487	495.609	1982.44	247.805	991.218
					8		EN1052817095M	90.1554	270.155	81.432	1.42126	34.2834	0.598358	115.714	178.746	24.4222		39.6487	495.609	1982.44	247.805	991.218
H09	Arquipelago Rupes	A	Y	1	1	335	EN0220807580M	267.648	87.648	66.831	1.16642	37.3652	0.652146	104.195	70.9611	22.8888		28.0053	350.067	1400.27	175.033	700.134
					2		EN0220807580M	267.648	87.648	66.831	1.16642	37.3652	0.652146	104.195	107.232	34.5881		28.0053	350.067	1400.27	175.033	700.134
					3		EN0220807580M	267.648	87.648	66.831	1.16642	37.3652	0.652146	104.195	87.8337	28.3311		28.0053	350.067	1400.27	175.033	700.134
					4		EN0220807580M	267.648	87.648	66.831	1.16642	37.3652	0.652146	104.195	81.2687	26.2135		28.0053	350.067	1400.27	175.033	700.134
			N	2		711
			Y	3	1	334	EN0220807580M	267.648	87.648	66.831	1.16642	37.3652	0.652146	104.195	292.74	94.4244		73.5152	918.94	3675.76	459.47	1837.88
					2		EN0220807580M	267.648	87.648	66.831	1.16642	37.3652	0.652146	104.195	187.557	60.4973		73.5152	918.94	3675.76	459.47	1837.88
					3		EN0220807580M	267.648	87.648	66.831	1.16642	37.3652	0.652146	104.195	203.452	65.624		73.5152	918.94	3675.76	459.47	1837.88
			Y	4	1	336	EN0220807580M	267.648	87.648	66.831	1.16642	37.3652	0.652146	104.195	164.986	53.2169		43.2925	541.156	2164.62	270.578	1082.31
					2		EN0220807580M	267.648	87.648	66.831	1.16642	37.3652	0.652146	104.195	108.645	35.0437		43.2925	541.156	2164.62	270.578	1082.31
					3		EN0220807580M	267.648	87.648	66.831	1.16642	37.3652	0.652146	104.195	114.924	37.0691		43.2925	541.156	2164.62	270.578	1082.31
					4		EN0220807580M	267.648	87.648	66.831	1.16642	37.3652	0.652146	104.195	148.317	47.8402		43.2925	541.156	2164.62	270.578	1082.31
			N	5		337
	Endurance Rupes	B	Y	1	1	389	EN1015627633M	267.517	87.5173	83.4844	1.45708	38.9942	0.680577	45.4248	436.51		54.9343	55.937	699.213	2796.85	349.607	1398.43
					2		EN1015627633M	267.517	87.5173	83.4844	1.45708	38.9942	0.680577	45.4248	457.637		57.593	55.937	699.213	2796.85	349.607	1398.43
					3		EN1015627633M	267.517	87.5173	83.4844	1.45708	38.9942	0.680577	45.4248	438.176		55.1439	55.937	699.213	2796.85	349.607	1398.43
					4		EN1015627633M	267.517	87.5173	83.4844	1.45708	38.9942	0.680577	45.4248	445.589		56.0769	55.937	699.213	2796.85	349.607	1398.43
				2	1	388	EN1015627633M	267.517	87.5173	83.4844	1.45708	38.9942	0.680577	45.4248	313.695		39.4781	44.0151	550.189	2200.76	275.095	1100.38
					2		EN1015627633M	267.517	87.5173	83.4844	1.45708	38.9942	0.680577	45.4248	385.798		48.5522	44.0151	550.189	2200.76	275.095	1100.38
				3	1	387	EN1015627633M	267.517	87.5173	83.4844	1.45708	38.9942	0.680577	45.4248	383.859		48.3082	61.0418	763.022	3052.09	381.511	1526.04
					2		EN1015627633M	267.517	87.5173	83.4844	1.45708	38.9942	0.680577	45.4248	487.96		61.4092	61.0418	763.022	3052.09	381.511	1526.04
					3		EN1015627633M	267.517	87.5173	83.4844	1.45708	38.9942	0.680577	45.4248	491.221		61.8195	61.0418	763.022	3052.09	381.511	1526.04
					4		EN1015627633M	267.517	87.5173	83.4844	1.45708	38.9942	0.680577	45.4248	638.253		80.3234	61.0418	763.022	3052.09	381.511	1526.04
					5		EN1015627633M	267.517	87.5173	83.4844	1.45708	38.9942	0.680577	45.4248	493.559		62.1138	61.0418	763.022	3052.09	381.511	1526.04
					6		EN1015627633M	267.517	87.5173	83.4844	1.45708	38.9942	0.680577	45.4248	415.393		52.2767	61.0418	763.022	3052.09	381.511	1526.04
				4	1	712	EN1015627633M	267.517	87.5173	83.4844	1.45708	38.9942	0.680577	45.4248	542.88		68.3208	59.6843	746.054	2984.21	373.027	1492.11
					2		EN1015627633M	267.517	87.5173	83.4844	1.45708	38.9942	0.680577	45.4248	401.79		50.5649	59.6843	746.054	2984.21	373.027	1492.11
					3		EN1015627633M	267.517	87.5173	83.4844	1.45708	38.9942	0.680577	45.4248	465.99		58.6443	59.6843	746.054	2984.21	373.027	1492.11
					4		EN1015627633M	267.517	87.5173	83.4844	1.45708	38.9942	0.680577	45.4248	486.355		61.2072	59.6843	746.054	2984.21	373.027	1492.11
				5	1	713	EN1015627633M	267.517	87.5173	83.4844	1.45708	38.9942	0.680577	45.4248	268.783		33.826	30.2181	377.726	1510.9	188.863	755.452
					2		EN1015627633M	267.517	87.5173	83.4844	1.45708	38.9942	0.680577	45.4248	228.687		28.78	30.2181	377.726	1510.9	188.863	755.452
					3		EN1015627633M	267.517	87.5173	83.4844	1.45708	38.9942	0.680577	45.4248	222.872		28.0482	30.2181	377.726	1510.9	188.863	755.452
				6	1	386	EN1015627633M	267.517	87.5173	83.4844	1.45708	38.9942	0.680577	45.4248	456.217		57.4143	49.0482	613.102	2452.41	306.551	1226.2
					2		EN1015627633M	267.517	87.5173	83.4844	1.45708	38.9942	0.680577	45.4248	529.446		66.6302	49.0482	613.102	2452.41	306.551	1226.2
					3		EN1015627633M	267.517	87.5173	83.4844	1.45708	38.9942	0.680577	45.4248	376.766		47.4155	49.0482	613.102	2452.41	306.551	1226.2
					4		EN1015627633M	267.517	87.5173	83.4844	1.45708	38.9942	0.680577	45.4248	196.527		24.7327	49.0482	613.102	2452.41	306.551	1226.2
				7	1	385	EN1015627633M	267.517	87.5173	83.4844	1.45708	38.9942	0.680577	45.4248	378.693		47.658	52.5351	656.689	2626.76	328.345	1313.38
					2		EN1015627633M	267.517	87.5173	83.4844	1.45708	38.9942	0.680577	45.4248	385.735		48.5442	52.5351	656.689	2626.76	328.345	1313.38
					3		EN1015627633M	267.517	87.5173	83.4844	1.45708	38.9942	0.680577	45.4248	309.623		38.9657	52.5351	656.689	2626.76	328.345	1313.38
					4		EN1015627633M	267.517	87.5173	83.4844	1.45708	38.9942	0.680577	45.4248	479.762		60.3775	52.5351	656.689	2626.76	328.345	1313.38
					5		EN1015627633M	267.517	87.5173	83.4844	1.45708	38.9942	0.680577	45.4248	508.11		63.9451	52.5351	656.689	2626.76	328.345	1313.38
					6		EN1015627633M	267.517	87.5173	83.4844	1.45708	38.9942	0.680577	45.4248	442.756		55.7203	52.5351	656.689	2626.76	328.345	1313.38
				8	1	384	EN1015627633M	267.517	87.5173	83.4844	1.45708	38.9942	0.680577	45.4248	93.4463		11.7601	14.1451	176.814	707.257	88.4071	353.628
					2		EN1015627633M	267.517	87.5173	83.4844	1.45708	38.9942	0.680577	45.4248	125.66		15.8142	14.1451	176.814	707.257	88.4071	353.628
					3		EN1015627633M	267.517	87.5173	83.4844	1.45708	38.9942	0.680577	45.4248	118.087		14.8611	14.1451	176.814	707.257	88.4071	353.628
				9	1	714	EN1015627633M	267.517	87.5173	83.4844	1.45708	38.9942	0.680577	45.4248	466.167		58.6666	81.5987	1019.98	4079.93	509.992	2039.97
					2		EN1015627633M	267.517	87.5173	83.4844	1.45708	38.9942	0.680577	45.4248	578.535		72.8079	81.5987	1019.98	4079.93	509.992	2039.97
					3		EN1015627633M	267.517	87.5173	83.4844	1.45708	38.9942	0.680577	45.4248	703.445		88.5278	81.5987	1019.98	4079.93	509.992	2039.97
					4		EN1015627633M	267.517	87.5173	83.4844	1.45708	38.9942	0.680577	45.4248	845.399		106.392	81.5987	1019.98	4079.93	509.992	2039.97
				10	1	341	EN1015627633M	267.517	87.5173	83.4844	1.45708	38.9942	0.680577	45.4248	712.388		89.6532	89.6532	1120.66	4482.66	560.332	2241.33
	Astrea Rupes	C	Y	1	1	346	EN0231353067M	80.2818	260.282	65.4666	1.14261	10.8111	0.18869	64.3839	182.708
					2		EN0231353067M	80.2818	260.282	65.4666	1.14261	10.8111	0.18869	64.3839	178.348
				2	1	347	EN0231353067M	80.2818	260.282	65.4666	1.14261	10.8111	0.18869	64.3839	256.745
					2		EN0231353067M	80.2818	260.282	65.4666	1.14261	10.8111	0.18869	64.3839	254.607
					3		EN0231353067M	80.2818	260.282	65.4666	1.14261	10.8111	0.18869	64.3839	208.678
				3	1	344	EN0231353067M	80.2818	260.282	65.4666	1.14261	10.8111	0.18869	64.3839	169.287
					2		EN0231353067M	80.2818	260.282	65.4666	1.14261	10.8111	0.18869	64.3839	146.089
	Carrasco Rupes	D	Y	1	1	382	EN0236024656M	272.027	92.0267	76.8381	1.34108	11.2984	0.197194	82.013	313.485	70.0354		64.4636	805.795	3223.18	402.897	1611.59
					2		EN0236024656M	272.027	92.0267	76.8381	1.34108	11.2984	0.197194	82.013	263.606	58.8918		64.4636	805.795	3223.18	402.897	1611.59
				2	1	381	EN0236024656M	272.027	92.0267	76.8381	1.34108	11.2984	0.197194	82.013	267.063	59.6642		55.376	692.2	2768.8	346.1	1384.4
					2		EN0236024656M	272.027	92.0267	76.8381	1.34108	11.2984	0.197194	82.013	227.038	50.7222		55.376	692.2	2768.8	346.1	1384.4
					3		EN0236024656M	272.027	92.0267	76.8381	1.34108	11.2984	0.197194	82.013	249.504	55.7414		55.376	692.2	2768.8	346.1	1384.4
	Pelagia Rupes	E	Y	1	1	390	EN0244025143M	90.633	270.633	87.9817	1.53557	52.6918	0.919646	140.673	358.666	12.0807		10.3466	129.333	517.331	64.6663	258.665
					2		EN0244025143M	90.633	270.633	87.9817	1.53557	52.6918	0.919646	140.673	400.874	13.5024		10.3466	129.333	517.331	64.6663	258.665
					3		EN0244025143M	90.633	270.633	87.9817	1.53557	52.6918	0.919646	140.673	441.694	14.8773		10.3466	129.333	517.331	64.6663	258.665
					4		EN0244025143M	90.633	270.633	87.9817	1.53557	52.6918	0.919646	140.673	360.309	12.136		10.3466	129.333	517.331	64.6663	258.665
					5		EN0244025143M	90.633	270.633	87.9817	1.53557	52.6918	0.919646	140.673	277.969	9.36262		10.3466	129.333	517.331	64.6663	258.665
					6		EN0244025143M	90.633	270.633	87.9817	1.53557	52.6918	0.919646	140.673	185.47	6.24707		10.3466	129.333	517.331	64.6663	258.665
					7		EN0244025143M	90.633	270.633	87.9817	1.53557	52.6918	0.919646	140.673	207.862	7.00128		10.3466	129.333	517.331	64.6663	258.665
					8		EN0244025143M	90.633	270.633	87.9817	1.53557	52.6918	0.919646	140.673	316.597	10.6637		10.3466	129.333	517.331	64.6663	258.665
					9		EN0244025143M	90.633	270.633	87.9817	1.53557	52.6918	0.919646	140.673	221.552	7.46239		10.3466	129.333	517.331	64.6663	258.665
					10		EN0244025143M	90.633	270.633	87.9817	1.53557	52.6918	0.919646	140.673	320.679	10.8012		10.3466	129.333	517.331	64.6663	258.665
					11		EN0244025143M	90.633	270.633	87.9817	1.53557	52.6918	0.919646	140.673	287.337	9.67816		10.3466	129.333	517.331	64.6663	258.665
	Arquipelago Rupes	F	Y	1	1	405	EN0251257770M	266.651	86.6513	69.8196	1.21858	10.9454	0.191032	80.6944	206.193	70.7548		58.6488	733.11	2932.44	366.555	1466.22
					2		EN0251257770M	266.651	86.6513	69.8196	1.21858	10.9454	0.191032	80.6944	135.634	46.5428		58.6488	733.11	2932.44	366.555	1466.22
			N	2		393
			Y	3	1	392	EN1045964746M	267.025	87.0249	74.3928	1.2984	17.736	0.309552	57.0817	353.944		108.571	103.695	1296.19	5184.75	648.094	2592.37
					2		EN1045964746M	267.025	87.0249	74.3928	1.2984	17.736	0.309552	57.0817	322.154		98.8194	103.695	1296.19	5184.75	648.094	2592.37
				4	1	391	EN1045964746M	267.025	87.0249	74.3928	1.2984	17.736	0.309552	57.0817	370.983		113.797	109.449	1368.12	5472.47	684.059	2736.24
					2		EN1045964746M	267.025	87.0249	74.3928	1.2984	17.736	0.309552	57.0817	342.634		105.101	109.449	1368.12	5472.47	684.059	2736.24
	Arquipelago Rupes	G	Y	1	1	408	EN0251257762M	266.404	86.4042	68.2677	1.1915	15.1486	0.264392	83.4111	170.542	61.357		55.7591	696.988	2787.95	348.494	1393.98
					2		EN0251257762M	266.404	86.4042	68.2677	1.1915	15.1486	0.264392	83.4111	139.423	50.1611		55.7591	696.988	2787.95	348.494	1393.98
				2	1	407	EN0251257762M	266.404	86.4042	68.2677	1.1915	15.1486	0.264392	83.4111	125.82	45.2671		33.0626	413.283	1653.13	206.641	826.566
					2		EN0251257762M	266.404	86.4042	68.2677	1.1915	15.1486	0.264392	83.4111	72.3989	26.0474		33.0626	413.283	1653.13	206.641	826.566
					3		EN0251257762M	266.404	86.4042	68.2677	1.1915	15.1486	0.264392	83.4111	77.474	27.8734		33.0626	413.283	1653.13	206.641	826.566
				3	1	411	EN0251257762M	266.404	86.4042	68.2677	1.1915	15.1486	0.264392	83.4111	56.0533	20.1667		20.1667	252.084	1008.33	126.042	504.167
				4	1	409	EN0251257762M	266.404	86.4042	68.2677	1.1915	15.1486	0.264392	83.4111	219.399	78.9347		78.9347	986.684	3946.74	493.342	1973.37
				5	1	410	EN0251257762M	266.404	86.4042	68.2677	1.1915	15.1486	0.264392	83.4111	196.239	70.6022		70.6022	882.527	3530.11	441.264	1765.05
				6	1	442	EN1015800736M	268.455	88.4554	79.8315	1.39332	38.7602	0.676493	41.0723	331.807		69.5249	48.3389	604.236	2416.94	302.118	1208.47
					2		EN1015800736M	268.455	88.4554	79.8315	1.39332	38.7602	0.676493	41.0723	259.595		54.3941	48.3389	604.236	2416.94	302.118	1208.47
					3		EN1015800736M	268.455	88.4554	79.8315	1.39332	38.7602	0.676493	41.0723	268.262		56.2101	48.3389	604.236	2416.94	302.118	1208.47
					4		EN1015800736M	268.455	88.4554	79.8315	1.39332	38.7602	0.676493	41.0723	169.844		35.5881	48.3389	604.236	2416.94	302.118	1208.47
					5		EN1015800736M	268.455	88.4554	79.8315	1.39332	38.7602	0.676493	41.0723	183.194		38.3853	48.3389	604.236	2416.94	302.118	1208.47
					6		EN1015800736M	268.455	88.4554	79.8315	1.39332	38.7602	0.676493	41.0723	171.48		35.9308	48.3389	604.236	2416.94	302.118	1208.47
				7	1	443	EN1015800736M	268.455	88.4554	79.8315	1.39332	38.7602	0.676493	41.0723	232.275		48.6695	45.7813	572.266	2289.06	286.133	1144.53
					2		EN1015800736M	268.455	88.4554	79.8315	1.39332	38.7602	0.676493	41.0723	204.707		42.8931	45.7813	572.266	2289.06	286.133	1144.53
				8	1	440	EN1015800780M	268.7	88.6999	79.7951	1.39269	38.1433	0.665726	41.6529	247.068		51.799	45.0952	563.69	2254.76	281.845	1127.38
					2		EN1015800780M	268.7	88.6999	79.7951	1.39269	38.1433	0.665726	41.6529	192.042		40.2624	45.0952	563.69	2254.76	281.845	1127.38
					3		EN1015800780M	268.7	88.6999	79.7951	1.39269	38.1433	0.665726	41.6529	206.169		43.2243	45.0952	563.69	2254.76	281.845	1127.38
				9	1	439	EN1015800780M	268.7	88.6999	79.7951	1.39269	38.1433	0.665726	41.6529	149.597		31.3637	36.2893	453.617	1814.47	226.808	907.233
					2		EN1015800780M	268.7	88.6999	79.7951	1.39269	38.1433	0.665726	41.6529	196.585		41.215	36.2893	453.617	1814.47	226.808	907.233
				10	1	438	EN1015800780M	268.7	88.6999	79.7951	1.39269	38.1433	0.665726	41.6529	368.571		77.2727	66.7561	834.452	3337.81	417.226	1668.9
					2		EN1015800780M	268.7	88.6999	79.7951	1.39269	38.1433	0.665726	41.6529	240.726		50.4694	66.7561	834.452	3337.81	417.226	1668.9
					3		EN1015800780M	268.7	88.6999	79.7951	1.39269	38.1433	0.665726	41.6529	345.932		72.5264	66.7561	834.452	3337.81	417.226	1668.9
				11	1	436	EN1015800780M	268.7	88.6999	79.7951	1.39269	38.1433	0.665726	41.6529	214.781		45.0299	47.4319	592.899	2371.59	296.449	1185.8
					2		EN1015800780M	268.7	88.6999	79.7951	1.39269	38.1433	0.665726	41.6529	300.971		63.1	47.4319	592.899	2371.59	296.449	1185.8
					3		EN1015800780M	268.7	88.6999	79.7951	1.39269	38.1433	0.665726	41.6529	219.083		45.9318	47.4319	592.899	2371.59	296.449	1185.8
					4		EN1015800780M	268.7	88.6999	79.7951	1.39269	38.1433	0.665726	41.6529	145.156		30.4325	47.4319	592.899	2371.59	296.449	1185.8
					5		EN1015800780M	268.7	88.6999	79.7951	1.39269	38.1433	0.665726	41.6529	251.199		52.6651	47.4319	592.899	2371.59	296.449	1185.8
			N	12		437
				13		435
			Y	14	1	434	EN1015800780M	268.7	88.6999	79.7951	1.39269	38.1433	0.665726	41.6529	263.053		55.1503	46.3482	579.353	2317.41	289.676	1158.71
					2		EN1015800780M	268.7	88.6999	79.7951	1.39269	38.1433	0.665726	41.6529	215.965		45.2781	46.3482	579.353	2317.41	289.676	1158.71
					3		EN1015800780M	268.7	88.6999	79.7951	1.39269	38.1433	0.665726	41.6529	184.19		38.6163	46.3482	579.353	2317.41	289.676	1158.71
			N	15		441
	Unnamed	H	Y	1	1	414	EN0251747625M	258.594	78.5942	44.4006	0.774936	39.7786	0.694267	76.1895	165.211	91.1846		103.195	1289.94	5159.77	644.971	2579.88
					2		EN0251747625M	258.594	78.5942	44.4006	0.774936	39.7786	0.694267	76.1895	208.733	115.206		103.195	1289.94	5159.77	644.971	2579.88
	Providencia Rupes	I	Y	1	1	415	EN1015944874M	268.817	88.817	80.3364	1.40213	46.6896	0.814887	33.6476	186.42		38.7414	39.5569	494.461	1977.85	247.231	988.923
					2		EN1015944874M	268.817	88.817	80.3364	1.40213	46.6896	0.814887	33.6476	194.268		40.3724	39.5569	494.461	1977.85	247.231	988.923
				2	1	416	EN1015944874M	268.817	88.817	80.3364	1.40213	46.6896	0.814887	33.6476	167.017		34.7091	38.5298	481.623	1926.49	240.812	963.246
					2		EN1015944874M	268.817	88.817	80.3364	1.40213	46.6896	0.814887	33.6476	111.21		23.1114	38.5298	481.623	1926.49	240.812	963.246
					3		EN1015944874M	268.817	88.817	80.3364	1.40213	46.6896	0.814887	33.6476	130.666		27.1548	38.5298	481.623	1926.49	240.812	963.246
					4		EN1015944874M	268.817	88.817	80.3364	1.40213	46.6896	0.814887	33.6476	112.681		23.417	38.5298	481.623	1926.49	240.812	963.246
					5		EN1015944874M	268.817	88.817	80.3364	1.40213	46.6896	0.814887	33.6476	323.027		67.1308	38.5298	481.623	1926.49	240.812	963.246
					6		EN1015944874M	268.817	88.817	80.3364	1.40213	46.6896	0.814887	33.6476	214.039		44.4812	38.5298	481.623	1926.49	240.812	963.246
					7		EN1015944874M	268.817	88.817	80.3364	1.40213	46.6896	0.814887	33.6476	239.174		49.7046	38.5298	481.623	1926.49	240.812	963.246
				3	1	430	EN1015944874M	268.817	88.817	80.3364	1.40213	46.6896	0.814887	33.6476	284.681		59.1619	60.2642	753.303	3013.21	376.651	1506.61
					2		EN1015944874M	268.817	88.817	80.3364	1.40213	46.6896	0.814887	33.6476	295.29		61.3665	60.2642	753.303	3013.21	376.651	1506.61
	Antares Rupes	J	N	1		426
			N	2		422
			N	3		423
			N	4		425
			N	5		424
			N	6		447
	Skagerak Rupes	K	N	1		454
			N	2		451
			N	3		452
			N	4		453
	Alpha Crucis	AC-A	Y	1	1	376	EN0251431360M	274.1	94.1002	75.6209	1.31983	9.17589	0.160149	66.4502	230.864		61.7428	66.4619	830.774	3323.1	415.387	1661.55
					2		EN0251431360M	274.1	94.1002	75.6209	1.31983	9.17589	0.160149	66.4502	244.15		65.2962	66.4619	830.774	3323.1	415.387	1661.55
					3		EN0251431360M	274.1	94.1002	75.6209	1.31983	9.17589	0.160149	66.4502	235.623		63.0156	66.4619	830.774	3323.1	415.387	1661.55
					4		EN0251431360M	274.1	94.1002	75.6209	1.31983	9.17589	0.160149	66.4502	264.658		70.7808	66.4619	830.774	3323.1	415.387	1661.55
					5		EN0251431360M	274.1	94.1002	75.6209	1.31983	9.17589	0.160149	66.4502	267.25		71.4742	66.4619	830.774	3323.1	415.387	1661.55
					6		EN0231136925M	76.1156	256.116	49.9385	0.871592	11.448	0.199805	50.2792	162.033
					7		EN0231136925M	76.1156	256.116	49.9385	0.871592	11.448	0.199805	50.2792	124.01
					8		EN0231136925M	76.1156	256.116	49.9385	0.871592	11.448	0.199805	50.2792	158.458
			N	2		377
				3		378
			Y	4	1	367	EN0231136927M	75.6743	255.674	48.8342	0.852318	11.7538	0.205142	51.6218	176.785
					2		EN0231136927M	75.6743	255.674	48.8342	0.852318	11.7538	0.205142	51.6218	176.324
					3		EN0231136927M	75.6743	255.674	48.8342	0.852318	11.7538	0.205142	51.6218	161.853
					4		EN0231136927M	75.6743	255.674	48.8342	0.852318	11.7538	0.205142	51.6218	171.276
					5		EN0231136927M	75.6743	255.674	48.8342	0.852318	11.7538	0.205142	51.6218	178.748
				5	1	368	EN0231136927M	75.6743	255.674	48.8342	0.852318	11.7538	0.205142	51.6218	145.579
					2		EN0231136927M	75.6743	255.674	48.8342	0.852318	11.7538	0.205142	51.6218	163.885
					3		EN0231136927M	75.6743	255.674	48.8342	0.852318	11.7538	0.205142	51.6218	170.021
					4		EN0231136927M	75.6743	255.674	48.8342	0.852318	11.7538	0.205142	51.6218	158.47
					5		EN0231136927M	75.6743	255.674	48.8342	0.852318	11.7538	0.205142	51.6218	228.351
					6		EN0231136927M	75.6743	255.674	48.8342	0.852318	11.7538	0.205142	51.6218	251.906
					7		EN0251431357M	273.705	93.7053	76.957	1.34315	11.8637	0.20706	65.0974	233.511		56.8619	46.4694	580.868	2323.47	290.434	1161.74
					8		EN0251431357M	273.705	93.7053	76.957	1.34315	11.8637	0.20706	65.0974	159.815		38.9162	46.4694	580.868	2323.47	290.434	1161.74
					9		EN0251431357M	273.705	93.7053	76.957	1.34315	11.8637	0.20706	65.0974	179.173		43.6302	46.4694	580.868	2323.47	290.434	1161.74
				6	1	371	EN0231136927M	75.6743	255.674	48.8342	0.852318	11.7538	0.205142	51.6218	212.718
					2		EN0231136927M	75.6743	255.674	48.8342	0.852318	11.7538	0.205142	51.6218	83.313
					3		EN0231136927M	75.6743	255.674	48.8342	0.852318	11.7538	0.205142	51.6218	118.352
					4		EN0231136927M	75.6743	255.674	48.8342	0.852318	11.7538	0.205142	51.6218	106.532
			N	7		370
				8		372
				9		366
			Y	10	1	369	EN0231136927M	75.6743	255.674	48.8342	0.852318	11.7538	0.205142	51.6218	142.831
					2		EN0231136927M	75.6743	255.674	48.8342	0.852318	11.7538	0.205142	51.6218	100.546
				11	1	364	EN0231136927M	75.6743	255.674	48.8342	0.852318	11.7538	0.205142	51.6218	210.831
					2		EN0231136927M	75.6743	255.674	48.8342	0.852318	11.7538	0.205142	51.6218	226.392
					3		EN0231136927M	75.6743	255.674	48.8342	0.852318	11.7538	0.205142	51.6218	224.096
					4		EN0251431357M	273.705	93.7053	76.957	1.34315	11.8637	0.20706	65.0974	430.796		104.902	104.902	1311.28	5245.12	655.64	2622.56
			N	12		365
				13		362
				14		363
				15		361
				16		360
				17		359
				18		358
				19		356
				20		355
				21		357
				22	1	354	EN0231136998M	72.775	252.775	47.1502	0.822926	13.4161	0.234155	53.7891	245.365
		AC-B		1		339
				2		340
				3		394
				4		395
				5		396
H10	Grifo Rupes	A	Y	1	1	459	EN1014818106M	90.5605	270.56	81.9591	1.43046	9.71935	0.169635	91.6698	230.438	31.7845		32.2801	403.501	1614.01	201.751	807.003
					2		EN1014818106M	90.5605	270.56	81.9591	1.43046	9.71935	0.169635	91.6698	250.379	34.535		32.2801	403.501	1614.01	201.751	807.003
					3		EN1014818106M	90.5605	270.56	81.9591	1.43046	9.71935	0.169635	91.6698	228.29	31.4882		32.2801	403.501	1614.01	201.751	807.003
					4		EN1014818106M	90.5605	270.56	81.9591	1.43046	9.71935	0.169635	91.6698	227.017	31.3127		32.2801	403.501	1614.01	201.751	807.003
			N	2		514
			Y	3	1	461	EN1014818106M	90.5605	270.56	81.9591	1.43046	9.71935	0.169635	91.6698	226.613	31.257		34.2308	427.885	1711.54	213.943	855.77
					2		EN1014818106M	90.5605	270.56	81.9591	1.43046	9.71935	0.169635	91.6698	269.734	37.2046		34.2308	427.885	1711.54	213.943	855.77
				4	1	460	EN1014818106M	90.5605	270.56	81.9591	1.43046	9.71935	0.169635	91.6698	311.988	43.0328		26.63	332.875	1331.5	166.438	665.751
					2		EN1014818106M	90.5605	270.56	81.9591	1.43046	9.71935	0.169635	91.6698	163.809	22.5944		26.63	332.875	1331.5	166.438	665.751
					3		EN1014818106M	90.5605	270.56	81.9591	1.43046	9.71935	0.169635	91.6698	165.17	22.7821		26.63	332.875	1331.5	166.438	665.751
					4		EN1014818106M	90.5605	270.56	81.9591	1.43046	9.71935	0.169635	91.6698	197.906	27.2974		26.63	332.875	1331.5	166.438	665.751
					5		EN1014818106M	90.5605	270.56	81.9591	1.43046	9.71935	0.169635	91.6698	126.465	17.4435		26.63	332.875	1331.5	166.438	665.751
	Calypso Rupes	B	Y	1	1	474	EN0250131823M	97.9965	277.997	68.0876	1.18835	0.666824	0.0116383	68.7297	92.5271	37.0455		62.376	779.7	3118.8	389.85	1559.4
					2		EN0250131823M	97.9965	277.997	68.0876	1.18835	0.666824	0.0116383	68.7297	160.976	64.4506		62.376	779.7	3118.8	389.85	1559.4
					3		EN0250131823M	97.9965	277.997	68.0876	1.18835	0.666824	0.0116383	68.7297	185.3	74.1894		62.376	779.7	3118.8	389.85	1559.4
					4		EN0250131823M	97.9965	277.997	68.0876	1.18835	0.666824	0.0116383	68.7297	194.783	77.986		62.376	779.7	3118.8	389.85	1559.4
					5		EN0250131823M	97.9965	277.997	68.0876	1.18835	0.666824	0.0116383	68.7297	145.385	58.2085		62.376	779.7	3118.8	389.85	1559.4
			N	2		473
			Y	3	1	472	EN1014011971M	95.2769	275.277	75.7077	1.32135	40.5803	0.70826	35.1279	369.398		120.37	120.37	1504.62	6018.48	752.31	3009.24
				4	1	469	EN1014011971M	95.2769	275.277	75.7077	1.32135	40.5803	0.70826	35.1279	222.482		72.4966	57.6778	720.973	2883.89	360.486	1441.95
					2		EN1014011971M	95.2769	275.277	75.7077	1.32135	40.5803	0.70826	35.1279	122.649		39.9655	57.6778	720.973	2883.89	360.486	1441.95
					3		EN1014011971M	95.2769	275.277	75.7077	1.32135	40.5803	0.70826	35.1279	185.885		60.5714	57.6778	720.973	2883.89	360.486	1441.95
			N	5		470
	Baltica Rupes	C	Y	1	1	493	EN1028933084M	88.0891	268.089	74.1048	1.29337	45.9235	0.801517	28.1819	166.108		67.0096	65.8267	822.833	3291.33	411.417	1645.67
					2		EN1028933084M	88.0891	268.089	74.1048	1.29337	45.9235	0.801517	28.1819	160.243		64.6437	65.8267	822.833	3291.33	411.417	1645.67
				2	1	494	EN1028933084M	88.0891	268.089	74.1048	1.29337	45.9235	0.801517	28.1819	186.347		75.1744	93.7097	1171.37	4685.49	585.686	2342.74
					2		EN0239829788M	273.346	93.3458	57.1813	0.998002	11.4291	0.199475	45.7564	164.534		122.02	93.7097	1171.37	4685.49	585.686	2342.74
					3		EN0239829788M	273.346	93.3458	57.1813	0.998002	11.4291	0.199475	45.7564	113.179		83.9348	93.7097	1171.37	4685.49	585.686	2342.74
				3	1	498	EN0239829788M	273.346	93.3458	57.1813	0.998002	11.4291	0.199475	45.7564	145.743		108.084	117.114	1463.93	5855.72	731.966	2927.86
					2		EN0239829788M	273.346	93.3458	57.1813	0.998002	11.4291	0.199475	45.7564	170.096		126.145	117.114	1463.93	5855.72	731.966	2927.86
				4	1	499	EN0239829788M	273.346	93.3458	57.1813	0.998002	11.4291	0.199475	45.7564	129.838		96.2889	93.4785	1168.48	4673.92	584.241	2336.96
					2		EN0239829788M	273.346	93.3458	57.1813	0.998002	11.4291	0.199475	45.7564	138.132		102.44	93.4785	1168.48	4673.92	584.241	2336.96
					3		EN0239829788M	273.346	93.3458	57.1813	0.998002	11.4291	0.199475	45.7564	117.216		86.9287	93.4785	1168.48	4673.92	584.241	2336.96
					4		EN0239829788M	273.346	93.3458	57.1813	0.998002	11.4291	0.199475	45.7564	119.007		88.2564	93.4785	1168.48	4673.92	584.241	2336.96
	Unnamed	D	Y	1	1	489	EN0234833318M	98.0469	278.047	59.929	1.04596	13.4212	0.234244	67.8703	149.702	76.156		76.156	951.95	3807.8	475.975	1903.9
				N	1	488	EN0234790883M	97.8494	277.849	61.0961	1.06633	11.2756	0.196795	63.9238	290.975
					2		EN0234790883M	97.8494	277.849	61.0961	1.06633	11.2756	0.196795	63.9238	317.575
					3		EN0234790883M	97.8494	277.849	61.0961	1.06633	11.2756	0.196795	63.9238	308.45
					4		EN0234790883M	97.8494	277.849	61.0961	1.06633	11.2756	0.196795	63.9238	390.234
			N	3	1	487	EN0234790883M	97.8494	277.849	61.0961	1.06633	11.2756	0.196795	63.9238	174.164
	Legend Rupes	E	Y	1	1	508	EN1004504512M	314.193	134.193	23.5927	0.41177	5.11517	0.0892766	28.703	206.515	392.426
					2		EN1004504512M	314.193	134.193	23.5927	0.41177	5.11517	0.0892766	28.703	195.538	371.567
				2	1	509	EN1004504512M	314.193	134.193	23.5927	0.41177	5.11517	0.0892766	28.703	340.36	646.763
					2		EN1004504512M	314.193	134.193	23.5927	0.41177	5.11517	0.0892766	28.703	376.549	715.53
					3		EN1004504512M	314.193	134.193	23.5927	0.41177	5.11517	0.0892766	28.703	461.892	877.7
					4		EN1004504512M	314.193	134.193	23.5927	0.41177	5.11517	0.0892766	28.703	442.877	841.568
					5		EN1004504512M	314.193	134.193	23.5927	0.41177	5.11517	0.0892766	28.703	389.008	739.204
				3	1	513	EN1004504512M	314.193	134.193	23.5927	0.41177	5.11517	0.0892766	28.703	114.656	217.873
					2		EN1004504512M	314.193	134.193	23.5927	0.41177	5.11517	0.0892766	28.703	173.921	330.491
				4	1	512	EN1004504512M	314.193	134.193	23.5927	0.41177	5.11517	0.0892766	28.703	426.406	810.269
					2		EN1004504512M	314.193	134.193	23.5927	0.41177	5.11517	0.0892766	28.703	558.949	1062.13
	Acadia Rupes	F	Y	1	1	516	EN1029538361M	91.9874	271.987	76.7287	1.33917	14.2744	0.249135	62.5131	47.041		11.8034	10.9645	137.057	548.227	68.5283	274.113
					2		EN1029538361M	91.9874	271.987	76.7287	1.33917	14.2744	0.249135	62.5131	47.8234		11.9998	10.9645	137.057	548.227	68.5283	274.113
					3		EN1029538361M	91.9874	271.987	76.7287	1.33917	14.2744	0.249135	62.5131	36.2284		9.09037	10.9645	137.057	548.227	68.5283	274.113
H11	Unnamed	A	Y	1	1	529	EN0239037747M	78.1223	258.122	67.1104	1.1713	14.584	0.254539	75.9678	349.545	132.972		145.38	1817.25	7269.01	908.626	3634.5
					2		EN0239037747M	78.1223	258.122	67.1104	1.1713	14.584	0.254539	75.9678	414.782	157.789		145.38	1817.25	7269.01	908.626	3634.5
	Behr Paima	B	N	1		530
				2		531
				3		532
	Suk Rupes	C	Y	1	1	727	EN0243884869M	275.588	95.588	77.4949	1.35254	10.8614	0.189567	66.638	175.439		40.6398	43.4875	543.594	2174.38	271.797	1087.19
					2		EN0243884869M	275.588	95.588	77.4949	1.35254	10.8614	0.189567	66.638	200.025		46.3352	43.4875	543.594	2174.38	271.797	1087.19
				2	1	537	EN0243884869M	275.588	95.588	77.4949	1.35254	10.8614	0.189567	66.638	178.929		41.4482	38.0781	475.976	1903.9	237.988	951.951
					2		EN0243884869M	275.588	95.588	77.4949	1.35254	10.8614	0.189567	66.638	149.831		34.7079	38.0781	475.976	1903.9	237.988	951.951
				3	1	726	EN0243884869M	275.588	95.588	77.4949	1.35254	10.8614	0.189567	66.638	140.137		32.4622	49.715	621.438	2485.75	310.719	1242.88
					2		EN0243884869M	275.588	95.588	77.4949	1.35254	10.8614	0.189567	66.638	289.095		66.9679	49.715	621.438	2485.75	310.719	1242.88
H12	Hero Rupes (Extension)	A	Y	1	1	560	BDR
					2		BDR
					3		BDR
H13	Noosfera Rupes	A	Y	1	1	306	EN1015139737M	270.611	90.611	88.3732	1.5424	4.02205	0.070198	84.3716	680.426		19.3636	12.8983	161.228	644.913	80.6141	322.457
					2		EN1015139737M	270.611	90.611	88.3732	1.5424	4.02205	0.070198	84.3716	591.983		16.8467	12.8983	161.228	644.913	80.6141	322.457
					3		EN1015139737M	270.611	90.611	88.3732	1.5424	4.02205	0.070198	84.3716	468.969		13.346	12.8983	161.228	644.913	80.6141	322.457
					4		EN1015139737M	270.611	90.611	88.3732	1.5424	4.02205	0.070198	84.3716	578.088		16.4513	12.8983	161.228	644.913	80.6141	322.457
					5		EN1015139737M	270.611	90.611	88.3732	1.5424	4.02205	0.070198	84.3716	310.819		8.84532	12.8983	161.228	644.913	80.6141	322.457
					6		EN1015139737M	270.611	90.611	88.3732	1.5424	4.02205	0.070198	84.3716	309.558		8.80942	12.8983	161.228	644.913	80.6141	322.457
					7		EN1015139737M	270.611	90.611	88.3732	1.5424	4.02205	0.070198	84.3716	232.816		6.6255	12.8983	161.228	644.913	80.6141	322.457
				2	1	308	EN1015139737M	270.611	90.611	88.3732	1.5424	4.02205	0.070198	84.3716	143.935		4.09612	4.55957	56.9946	227.978	28.4973	113.989
					2		EN1015139737M	270.611	90.611	88.3732	1.5424	4.02205	0.070198	84.3716	176.505		5.02301	4.55957	56.9946	227.978	28.4973	113.989
				3	1	307	EN1015139737M	270.611	90.611	88.3732	1.5424	4.02205	0.070198	84.3716	480.176		13.6649	17.4264	217.829	871.318	108.915	435.659
					2		EN1015139737M	270.611	90.611	88.3732	1.5424	4.02205	0.070198	84.3716	536.424		15.2656	17.4264	217.829	871.318	108.915	435.659
					3		EN1015139737M	270.611	90.611	88.3732	1.5424	4.02205	0.070198	84.3716	669.751		19.0598	17.4264	217.829	871.318	108.915	435.659
					4		EN1015139737M	270.611	90.611	88.3732	1.5424	4.02205	0.070198	84.3716	763.054		21.7151	17.4264	217.829	871.318	108.915	435.659
H14	Unnamed	A	N	1		612
H15	Altair Rupes	A	Y	1	1	704	BDR
					2		BDR
					3		BDR
			N	2		705
	Seol Mara Rupes	B	Y	1	1	621	HIW
			Y	2	1	620	HIW
					2		HIW
					3		HIW

## Sheet: Length, width, depth
								Lunar rate		Mercury rate		Lunar rate		Mercury rate
	Name	Can shadow measurements be made?	Graben designation	Graben FixedID	Length (km)	Average width (m)	Average depth (m)	Rate of infilling fastes (8cm/ma)	Rate of infilling slowest (2cm/ma)	Rate of infilling fastest (16cm/ma)	Rate of infilling slowest (4cm/ma)	Average for fastest rate (8cm/ma)	Average for slowest rate (2cm/ma)	Average for fastes rate (16cm/ma)	Average for slowest rate (4cm/ma)
H01	H01 A	Y	1	682	7.19992	302.124	26.9662	337.077	1348.31	168.539	674.154	597.751	2391	298.875	1195.5
		Y	2	683	2.2544	129.204	7.40345	92.5432	370.173	46.2716	185.086
		N	3	684	0.280335	60.1225	N/A
	H01 B	N	1	626	1.76728	132.051	N/A
	H01 C	N	1	694	5.84969	586.153	N/A
H02	H02 A	N	1	17	0.828477	155.953	N/A
		Y	2	28	1.02619	197.007	5.67909	70.9887	283.955	35.4943	141.977
		Y	3	27	0.908905	195.098	8.88785	111.098	444.393	55.5491	222.196
H03	H03 A	N	1	56	4.25451	662.259	N/A
	H03 B	Y	1	60	4.27112	506.39	25.693	321.162	1284.65	160.581	642.325
	H03 C	N	1	69	0.478036	90.7518	N/A
		N	2	70	0.479299	71.4474	N/A
H04	H04 A	Y	1	119	4.32588	321.306	22.151	276.887	1107.55	138.444	553.774
	H04 A	Y	2	105	0.947546	255.417	21.7842	272.302	1089.21	136.151	544.604
		Y	3	106	2.55763	286.447	23.2368	290.46	1161.84	145.23	580.92
		Y	4	104	3.89992	513.248	22.4514	280.643	1122.57	140.321	561.285
		Y	5	118	3.03059	314.736	18.7079	233.849	935.397	116.925	467.699
		N	6	117	2.64607	297.093	N/A
		N	7	116	1.10946	246.826	N/A
	H04 B	N	1	120	0.765	157.985	N/A
		N	2	121	2.69783	246.805	N/A
	H04 C	Y	1	98	7.93657	539.989	35.1633	439.541	1758.16	219.771	879.082
		Y	2	99	2.41904	428.538	41.9677	524.596	2098.38	262.298	1049.19
		N	3	101	3.23267	552.135	N/A
		N	4	102	1.66697	522.215	N/A
	H04 D	N	1	138	6.77304	696.294	N/A
	H04 E	N	1	148	23.1548	1186.47	N/A
H06	H06 A	Y	1	213	12.3326	1905.45	33.6179	420.224	1680.9	210.112	840.448
	H06 B	N	1	183	5.03528	530.09	N/A
		Y	2	182	4.00974	752.255	42.9718	537.148	2148.59	268.574	1074.3
H08	H08 A	N	1	318	8.78449	754.721	N/A
		N	2	317	3.98775	347.918	N/A
	H08 B	N	1	262	5.56844	535.456	N/A
		N	2	263	7.28753	455.916	N/A
		Y	3	233	5.29992	295.513	29.1973	364.966	1459.87	182.483	729.933
		Y	4	231	2.91217	325.912	30.4927	381.159	1524.64	190.58	762.319
		Y	5	709	1.8439	258.398	18.6557	233.197	932.787	116.598	466.394
		Y	6	232	4.49417	374.207	43.053	538.162	2152.65	269.081	1076.32
		Y	7	706	2.37254	478.788	19.8801	248.502	994.007	124.251	497.003
		Y	8	707	3.23781	363.259	26.6266	332.832	1331.33	166.416	665.664
		Y	9	235	3.3058	329.818	21.0226	262.783	1051.13	131.392	525.566
		Y	10	236	4.73871	423.371	40.7938	509.922	2039.69	254.961	1019.84
		Y	11	234	4.5879	366.49	44.3553	554.441	2217.77	277.221	1108.88
		Y	12	295	2.32062	308.846	38.4639	480.799	1923.19	240.399	961.597
		N	13	708	1.76104	223.085	N/A
		Y	14	273	5.17003	212.052	33.8911	423.639	1694.56	211.819	847.278
	H08 C	N	1	221	2.43831	559.577	N/A
		N	2	225	5.49995	1022.25	N/A
		N	3	223	6.95701	767.951	N/A
		N	4	224	3.64561	953.837	N/A
	H08 D	Y	5	246	4.34028	556.51	30.4695	380.869	1523.47	190.434	761.737
	H08 E	Y	1	249	3.19326	621.568	63.1682	789.603	3158.41	394.801	1579.21
	H08 F	Y	1	261	7.68858	524.808	124.8	1560	6239.99	779.999	3120
		Y	2	258	6.10925	866.739	56.4798	705.998	2823.99	352.999	1412
		Y	3	260	4.24998	560.995	53.4548	668.185	2672.74	334.092	1336.37
		Y	4	259	5.56354	852.325	77.7583	971.979	3887.91	485.989	1943.96
	H08 G	Y	1	275	2.79938	609.592	108.609	1357.61	5430.45	678.807	2715.23
		Y	2	279	1.80409	378.946	34.8207	435.258	1741.03	217.629	870.517
		Y	3	276	1.50543	384.681	34.2208	427.76	1711.04	213.88	855.52
		Y	4	277	0.679417	267.048	45.1759	564.699	2258.8	282.349	1129.4
		Y	5	710	4.329	408.273	46.7114	583.893	2335.57	291.946	1167.79
		Y	6	278	3.14755	402.747	32.9976	412.47	1649.88	206.235	824.941
	H08 H	N	1	288	16.9015	1197.23	N/A
	H08 I	Y	1	289	5.11817	416.065	13.295	166.188	664.75	83.0938	332.375
		Y	2	290	4.16159	442.397	19.4205	242.756	971.025	121.378	485.513
	H08 J	N	1	292	3.63881	491.662	N/A
		N	2	291	2.7582	693.331	N/A
		N	3	293	5.02416	616.806	N/A
	H08 K	Y	1	309	2.46967	266.518	12.1528	151.91	607.638	75.9548	303.819
		Y	2	310	2.35906	278.337	16.9154	211.443	845.771	105.721	422.885
	H08 L	Y	1	287	10.2615	777.431	39.6487	495.609	1982.44	247.805	991.218
H09	H09 A	Y	1	335	2.42777	702.721	28.0053	350.067	1400.27	175.033	700.134
		N	2	711	5.59984	789.053	N/A
		Y	3	334	4.00199	1337.62	73.5152	918.94	3675.76	459.47	1837.88
		Y	4	336	1.95757	370.362	43.2925	541.156	2164.62	270.578	1082.31
		N	5	337	1.69556	351.094	N/A
	H09 B	Y	1	389	4.84912	733.323	55.937	699.213	2796.85	349.607	1398.43
		Y	2	388	3.32004	475.889	44.0151	550.189	2200.76	275.095	1100.38
		Y	3	387	7.72188	587.098	61.0418	763.022	3052.09	381.511	1526.04
		Y	4	712	4.1214	766.936	59.6843	746.054	2984.21	373.027	1492.11
		Y	5	713	1.69344	327.519	30.2181	377.726	1510.9	188.863	755.452
		Y	6	386	3.21492	374.972	49.0482	613.102	2452.41	306.551	1226.2
		Y	7	385	3.83015	482.629	52.5351	656.689	2626.76	328.345	1313.38
		Y	8	384	1.28508	188.865	14.1451	176.814	707.257	88.4071	353.628
		Y	9	714	6.43686	634.01	81.5987	1019.98	4079.93	509.992	2039.97
		Y	10	341	3.22356	502.275	89.6532	1120.66	4482.66	560.332	2241.33
	H09 C	N	1	346	9.31022	927.31	N/A
		N	2	347	6.2582	1018.9	N/A
		N	3	344	2.23885	412.085	N/A
	H09 D	Y	1	382	7.16636	1297.71	64.4636	805.795	3223.18	402.897	1611.59
		Y	2	381	9.28488	1838.07	55.376	692.2	2768.8	346.1	1384.4
	H09 E	Y	1	390	12.0427	984.455	10.3466	129.333	517.331	64.6663	258.665
	H09 F	Y	1	405	6.05005	433.077	58.6488	733.11	2932.44	366.555	1466.22
		N	2	393	9.49924	1011.41	N/A
		Y	3	392	3.4236	952.886	103.695	1296.19	5184.75	648.094	2592.37
		Y	4	391	4.01301	830.127	109.449	1368.12	5472.47	684.059	2736.24
	H09 G	Y	1	408	1.30468	436.419	55.7591	696.988	2787.95	348.494	1393.98
		Y	2	407	6.68547	328.788	33.0626	413.283	1653.13	206.641	826.566
		Y	3	411	1.90143	246.45	20.1667	252.084	1008.33	126.042	504.167
		Y	4	409	2.63151	318.306	78.9347	986.684	3946.74	493.342	1973.37
		Y	5	410	5.95183	553.128	70.6022	882.527	3530.11	441.264	1765.05
		Y	6	442	7.64639	586.664	48.3389	604.236	2416.94	302.118	1208.47
		Y	7	443	2.85042	455.267	45.7813	572.266	2289.06	286.133	1144.53
		Y	8	440	4.71728	1396.28	45.0952	563.69	2254.76	281.845	1127.38
		Y	9	439	2.81094	705.376	36.2893	453.617	1814.47	226.808	907.233
		Y	10	438	4.76733	777.707	66.7561	834.452	3337.81	417.226	1668.9
		Y	11	436	5.24369	699.404	47.4319	592.899	2371.59	296.449	1185.8
		N	12	437	2.56624	354.38	N/A
		N	13	435	2.1862	493.318	N/A
		Y	14	434	7.29397	495.531	46.3482	579.353	2317.41	289.676	1158.71
		N	15	441	4.15648	N/A	N/A
	H09 H	Y	1	414	5.83401	330.175	103.195	1289.94	5159.77	644.971	2579.88
	H09 I	Y	1	415	9.11	363.688	39.5569	494.461	1977.85	247.231	988.923
		Y	2	416	6.42304	559.219	38.5298	481.623	1926.49	240.812	963.246
		Y	3	430	4.039	759.281	60.2642	753.303	3013.21	376.651	1506.61
	H09 J	N	1	426	1.9924	564.934	N/A
		N	2	422	3.66951	596.029	N/A
		N	3	423	9.11098	359.295	N/A
		N	4	425	6.56554	322.955	N/A
		N	5	424	4.98687	670.817	N/A
		N	6	447	2.94757	292.645	N/A
		N	7	448	2.55665	482.831	N/A
	H09 K	N	1	454	5.7256	629.868	N/A
		N	2	451	6.10463	803.691	N/A
		N	3	452	2.95985	606.347	N/A
		N	4	453	3.20446	643.707	N/A
	AC A	Y	1	376	15.5631	1625.03	66.4619	830.774	3323.1	415.387	1661.55
		N	2	378	8.93358	1093.55	N/A
		N	3	377	4.24363	846.249	N/A
		N	4	367	11.8907	1067.32	N/A
		Y	5	368	17.8819	1105.27	46.4694	580.868	2323.47	290.434	1161.74
		N	6	371	10.001	663.799	N/A
		N	7	370	7.72008	275.268	N/A
		N	8	372	2.57894	N/A	N/A
		N	9	366	3.51309	1133.18	N/A
		N	10	369	3.14678	997.708	N/A
		Y	11	364	10.4757	1226.09	104.902	1311.28	5245.12	655.64	2622.56
		N	12	365	8.18518	N/A	N/A
		N	13	362	5.15133	N/A	N/A
		N	14	363	4.28427	N/A	N/A
		N	15	361	8.91562	1084.88	N/A
		N	16	360	4.92847	1307	N/A
		N	17	359	5.34057	1589.32	N/A
		N	18	358	8.11708	1199.71	N/A
		N	19	356	5.94346	1414.1	N/A
		N	20	355	4.09302	897.703	N/A
		N	21	357	4.60811	780.095	N/A
		N	22	354	7.13721	1289.47	N/A
	AC B	N	1	339	7.42344	686.009	N/A
		N	2	340	6.22922	746.634	N/A
		N	3	394	4.99091	770.512	N/A
		N	4	395	4.34188	469.774	N/A
		N	5	396	2.37764	441.917	N/A
H10	H10 A	Y	1	459	3.0689	579.793	32.2801	403.501	1614.01	201.751	807.003
		N	2	514	2.17927	496.314	N/A
		Y	3	461	2.53216	1033.51	34.2308	427.885	1711.54	213.943	855.77
		Y	4	460	4.80446	587.302	26.63	332.875	1331.5	166.438	665.751
	H10 B	Y	1	474	6.25594	1014.13	62.376	779.7	3118.8	389.85	1559.4
		N	2	473	8.47692	853.953	N/A
		Y	3	472	11.8573	1264.48	120.37	1504.62	6018.48	752.31	3009.24
		Y	4	469	14.1426	1380	57.6778	720.973	2883.89	360.486	1441.95
		N	5	470	4.13911	1195.91	N/A
	H10 C	Y	1	493	9.64692	691.5	65.8267	822.833	3291.33	411.417	1645.67
		Y	2	494	7.6028	770.044	93.7097	1171.37	4685.49	585.686	2342.74
		Y	3	498	4.73001	673.615	117.114	1463.93	5855.72	731.966	2927.86
		Y	4	499	6.46706	525.339	93.4785	1168.48	4673.92	584.241	2336.96
	H10 D	Y	1	489	5.3663	734.853	76.156	951.95	3807.8	475.975	1903.9
		N	2	488	8.99131	1001.81	N/A
		N	3	487	5.8613	552.473	N/A
	H10 E	N	1	508	4.02166	494.419	N/A
		N	2	509	10.4163	717.957	N/A
		N	3	513	4.3377	999.967	N/A
		N	4	512	8.13452	1247.68	N/A
	H10 F	Y	1	516	3.04894	467.83	10.9645	137.057	548.227	68.5283	274.113
H11	H11 A	Y	1	529	9.01064	1170.8	145.38	1817.25	7269.01	908.626	3634.5
	H11 B	N	1	530	3.82466	678.232	N/A
		N	2	531	4.02927	491.11	N/A
		N	3	532	3.45893	757.804	N/A
	H11 C	Y	1	727	5.00147	600.102	43.4875	543.594	2174.38	271.797	1087.19
		Y	2	537	7.43979	573.654	38.0781	475.976	1903.9	237.988	951.951
		Y	3	726	14.2944	993.262	49.715	621.438	2485.75	310.719	1242.88
H12	H12 A	N	1	560	27.4735	1149.59	N/A
H13	H13 A	Y	1	306	11.9885	1119.78	12.8983	161.228	644.913	80.6141	322.457
		Y	2	308	3.98202	944.487	4.55957	56.9946	227.978	28.4973	113.989
		Y	3	307	13.509	784.753	17.4264	217.829	871.318	108.915	435.659
H14	H14 A	N	1	612	5.3139	663.989	N/A
H15	H15 A	N	1	704	30.3758	1767.55	N/A
		N	2	705	14.2202	1428.28	N/A
	H15 B	N	1	621	11.3896	1538.32	N/A
		N	2	620	11.3676	1274.32	N/A

## Sheet: Displacement-Length Scaling
		Gamma	0.01		Infill rate	0.08
Length (km)	Average depth (m)	Depth from length (mean)	Dmax gamma = 10^-2	Infilled amount	How long it would take to infill the average depth (Ma)	How long it would take to infill the Dmax (Ma)		Age of graben (Ma)	Age of graben (Ma)
7.2	27		72	45	337.5	900		562.5	562.5			Mean age	388.918
2.3	7.4		23	15.6	92.5	287.5		195	195			Median age	231.875
1	5.7		10	4.3	71.25	125		53.75	53.75
0.9	8.9		9	0.1	111.25	112.5		1.25	1.25
4.3	25.7		43	17.3	321.25	537.5		216.25	216.25
4.3	22.2		43	20.8	277.5	537.5		260	260
0.9	21.8		9	-12.8	272.5	112.5		-160	FALSE
2.6	23.2		26	2.8	290	325		35	35
3.9	22.5		39	16.5	281.25	487.5		206.25	206.25
3	18.7		30	11.3	233.75	375		141.25	141.25
7.9	35.2		79	43.8	440	987.5		547.5	547.5
2.4	42		24	-18	525	300		-225	FALSE
12.3	33.6		123	89.4	420	1537.5		1117.5	1117.5
4	43		40	-3	537.5	500		-37.5	FALSE
5.3	29.2		53	23.8	365	662.5		297.5	297.5
2.9	30.5		29	-1.5	381.25	362.5		-18.75	FALSE
1.8	18.7		18	-0.7	233.75	225		-8.75	FALSE
4.5	43.1		45	1.9	538.75	562.5		23.75	23.75
2.4	19.9		24	4.1	248.75	300		51.25	51.25
3.2	26.6		32	5.4	332.5	400		67.5	67.5
3.3	21		33	12	262.5	412.5		150	150
4.7	40.8		47	6.2	510	587.5		77.5	77.5
4.6	44.4		46	1.6	555	575		20	20
2.3	38.5		23	-15.5	481.25	287.5		-193.75	FALSE
5.2	33.9		52	18.1	423.75	650		226.25	226.25
4.3	30.5		43	12.5	381.25	537.5		156.25	156.25
3.2	63.2		32	-31.2	790	400		-390	FALSE
7.7	124.8		77	-47.8	1560	962.5		-597.5	FALSE
6.1	56.5		61	4.5	706.25	762.5		56.25	56.25
4.2	53.5		42	-11.5	668.75	525		-143.75	FALSE
5.6	77.8		56	-21.8	972.5	700		-272.5	FALSE
2.8	108.6		28	-80.6	1357.5	350		-1007.5	FALSE
1.8	34.8		18	-16.8	435	225		-210	FALSE
1.5	34.2		15	-19.2	427.5	187.5		-240	FALSE
0.7	45.2		7	-38.2	565	87.5		-477.5	FALSE
4.3	46.7		43	-3.7	583.75	537.5		-46.25	FALSE
3.1	33		31	-2	412.5	387.5		-25	FALSE
5.1	13.3		51	37.7	166.25	637.5		471.25	471.25
4.2	19.4		42	22.6	242.5	525		282.5	282.5
2.5	12.2		25	12.8	152.5	312.5		160	160
2.4	16.9		24	7.1	211.25	300		88.75	88.75
10.3	39.6		103	63.4	495	1287.5		792.5	792.5
2.4	28		24	-4	350	300		-50	FALSE
4	73.5		40	-33.5	918.75	500		-418.75	FALSE
2	43.3		20	-23.3	541.25	250		-291.25	FALSE
4.8	55.9		48	-7.9	698.75	600		-98.75	FALSE
3.3	44		33	-11	550	412.5		-137.5	FALSE
7.7	61		77	16	762.5	962.5		200	200
4.1	59.7		41	-18.7	746.25	512.5		-233.75	FALSE
1.7	30.2		17	-13.2	377.5	212.5		-165	FALSE
3.2	49		32	-17	612.5	400		-212.5	FALSE
3.8	52.5		38	-14.5	656.25	475		-181.25	FALSE
1.3	14.1		13	-1.1	176.25	162.5		-13.75	FALSE
6.4	81.6		64	-17.6	1020	800		-220	FALSE
3.2	89.7		32	-57.7	1121.25	400		-721.25	FALSE
7.2	64.5		72	7.5	806.25	900		93.75	93.75
9.3	55.4		93	37.6	692.5	1162.5		470	470
12	10.3		120	109.7	128.75	1500		1371.25	1371.25
6.1	58.6		61	2.4	732.5	762.5		30	30
3.4	103.7		34	-69.7	1296.25	425		-871.25	FALSE
4	109.4		40	-69.4	1367.5	500		-867.5	FALSE
1.3	55.8		13	-42.8	697.5	162.5		-535	FALSE
6.7	33.1		67	33.9	413.75	837.5		423.75	423.75
1.9	20.2		19	-1.2	252.5	237.5		-15	FALSE
2.6	78.9		26	-52.9	986.25	325		-661.25	FALSE
6	70.6		60	-10.6	882.5	750		-132.5	FALSE
7.6	48.3		76	27.7	603.75	950		346.25	346.25
2.9	45.8		29	-16.8	572.5	362.5		-210	FALSE
4.7	45.1		47	1.9	563.75	587.5		23.75	23.75
2.8	36.3		28	-8.3	453.75	350		-103.75	FALSE
4.8	66.8		48	-18.8	835	600		-235	FALSE
5.2	47.4		52	4.6	592.5	650		57.5	57.5
7.3	46.3		73	26.7	578.75	912.5		333.75	333.75
5.8	103.2		58	-45.2	1290	725		-565	FALSE
9.1	39.6		91	51.4	495	1137.5		642.5	642.5
6.4	38.5		64	25.5	481.25	800		318.75	318.75
4	60.3		40	-20.3	753.75	500		-253.75	FALSE
15.6	66.5		156	89.5	831.25	1950		1118.75	1118.75
17.9	46.5		179	132.5	581.25	2237.5		1656.25	1656.25
10.5	104.9		105	0.1	1311.25	1312.5		1.25	1.25
3.1	32.3		31	-1.3	403.75	387.5		-16.25	FALSE
2.5	34.2		25	-9.2	427.5	312.5		-115	FALSE
4.8	26.6		48	21.4	332.5	600		267.5	267.5
6.3	62.4		63	0.6	780	787.5		7.5	7.5
11.9	120.4		119	-1.4	1505	1487.5		-17.5	FALSE
14.1	57.7		141	83.3	721.25	1762.5		1041.25	1041.25
9.6	65.8		96	30.2	822.5	1200		377.5	377.5
7.6	93.7		76	-17.7	1171.25	950		-221.25	FALSE
4.7	117.1		47	-70.1	1463.75	587.5		-876.25	FALSE
6.5	93.5		65	-28.5	1168.75	812.5		-356.25	FALSE
5.4	76.2		54	-22.2	952.5	675		-277.5	FALSE
3	11		30	19	137.5	375		237.5	237.5
9	145.4		90	-55.4	1817.5	1125		-692.5	FALSE
5	43.5		50	6.5	543.75	625		81.25	81.25
7.4	38.1		74	35.9	476.25	925		448.75	448.75
14.3	49.7		143	93.3	621.25	1787.5		1166.25	1166.25
12	12.9		120	107.1	161.25	1500		1338.75	1338.75
4	4.6		40	35.4	57.5	500		442.5	442.5
13.5	17.4		135	117.6	217.5	1687.5		1470	1470
